# Supplementary material
Source: publisher site journal article supplement (https://www.dovepress.com/article/234665)
Supplement: Supplementary file 1 [file get_supplementary_file.php]

**Suppl. Table 1 Example of the record sheet for GTT/ITT**

| MOUSE            | NAME 1 | NAME 2 | NAME 3 | NAME 4 |
|------------------|--------|--------|--------|--------|
| Body weight      |        |        |        |        |
| Volume injection |        |        |        |        |
| TIME             |        |        |        |        |
| 0'               | INJECT |        |        |        |
| 3'               |        | INJECT |        |        |
| 6'               |        |        | INJECT |        |
| 9'               |        |        |        | INJECT |
| 12'              |        |        |        |        |
| 15'              | BLOOD  |        |        |        |
| 18'              |        | BLOOD  |        |        |
| 21'              |        |        | BLOOD  |        |
| 24'              |        |        |        | BLOOD  |
| 27'              |        |        |        |        |
| 30'              | BLOOD  |        |        |        |
| 33'              |        | BLOOD  |        |        |
| 36'              |        |        | BLOOD  |        |
| 39'              |        |        |        | BLOOD  |
| 42'              |        |        |        |        |
| 45'              |        |        |        |        |
| 60'              | BLOOD  |        |        |        |
| 63'              |        | BLOOD  |        |        |
| 66'              |        |        | BLOOD  |        |
| 69'              |        |        |        | BLOOD  |
| 72'              |        |        |        |        |
| 75'              |        |        |        |        |
| 90'              | BLOOD  |        |        |        |
| 93'              |        | BLOOD  |        |        |
| 96'              |        |        | BLOOD  |        |
| 99'              |        |        |        | BLOOD  |
| 102'             |        |        |        |        |
| 105'             |        |        |        |        |
| 108'             |        |        |        |        |
| 111'             |        |        |        |        |
| 114'             |        |        |        |        |
| 117'             |        |        |        |        |
| 120'             | BLOOD  |        |        |        |
| 123'             |        | BLOOD  |        |        |
| 126'             |        |        | BLOOD  |        |
| 129'             |        |        |        | BLOOD  |
